# Supplementary material for: Co-frequency or contrary? The effects of Qiwei Baizhu Powder and its bioactive compounds on mucosa-associated microbiota of mice with antibiotic-associated diarrhea
Source: Front Cell Infect Microbiol. 2024 Oct 28;14:1483048. doi: 10.3389/fcimb.2024.1483048 (PMC11551125; doi:10.3389/fcimb.2024.1483048)
Supplement: Supplementary file 1 [file Table1.docx]

**Supplementary Table 1**

Identification of chemical constituents of QWBZP-TG

| No. | Identification | Formula | Relative amount (%) |
| --- | --- | --- | --- |
| 1 | puerarin | C21H20O9 | 7.25 |
| 2 | 3'-methoxypuerarin | C22H22O10 | 5.48 |
| 3 | 3'-hydroxypuerarin | C21H20O10 | 3.79 |
| 4 | 6''-*O*-xylosylpuerarin | C26H28O13 | 3.62 |
| 5 | daidzin | C21H20O9 | 2.31 |
| 6 | isoacteoside | C29H35O15 | 2.19 |
| 7 | acteoside | C29H35O15 | 1.29 |
| 8 | genistein-8-*C*-apiosyl(1-6)-glucoside | C26H28O14 | 0.92 |
| 9 | formonononetin-8-*C*-glucoside-*O*-xyloside | C27H30O13 | 0.76 |
| 10 | daidzein | C15H10O4 | 0.66 |
| 11 | ginsenoside Rg1 | C42H72O14 | 0.49 |
| 12 | glycyrrhizic acid | C42H62O16 | 0.43 |
| 13 | Isoliquiritin apioside or isomer | C26H30O13 | 0.41 |
| 14 | genistein-8-*C*-glucoside | C21H20O10 | 0.39 |
| 15 | pueroside A | C29H34O14 | 0.38 |
| 16 | ginsenoside Rk3 | C36H60O8 | 0.25 |
| 17 | 4'-*O*-methoxypuerarin | C22H22O9 | 0.21 |
| 18 | ginsenoside Ro | C48H76O19 | 0.18 |
| 19 | ginsenoside 20(*R*)-Rg3 | C42H72O13 | 0.17 |
| 20 | ginsenoside F1 | C36H62O9 | 0.16 |
| 21 | genistin | C21H19O10 | 0.15 |
| 22 | 3'-methoxypuerarin-6''-*O*-*β*-Apionoside | C27H30O14 | 0.12 |
| 23 | liquiritin* | C21H22O9 | 0.12 |
| 24 | puerarin-7-*O*-glucoside | C27H30O14 | 0.11 |
| 25 | daidzein-4',7-*O*-glucoside | C29H32O18 | 0.11 |
| 26 | 3'-hydroxypuerarin xyloside | C26H28O14 | 0.07 |
| 27 | formonononetin | C16H12O4 | 0.07 |
| 28 | Liquiritin apioside* | C26H30O13 | 0.06 |
| 29 | genistein | C15H10O5 | 0.06 |
| 30 | apigenin | C15H10O5 | 0.06 |
| 31 | ginsenoside Rc | C53H90O22 | 0.04 |
| 32 | 4',6-dimethoxyisoflavone-7-*O*-glucoside | C23H24O10 | 0.03 |
| 33 | isoliquiritin | C21H22O9 | 0.03 |
| 34 | licorice saponin G2 | C42H62O17 | 0.02 |
| 35 | leucosceptoside A | C30H37O15 | 0.02 |
| 36 | naringenin | C15H12O5 | 0.02 |
| 37 | licorice saponin A3 | C48H72O21 | 0.01 |
| 38 | ginsenoside Re1/2/3 | C48H82O19 | — |
| 39 | ginsenoside Ⅰ/Ⅱ | C48H82O20 | — |
| 40 | ginsenoside Re | C48H82O18 | — |
| 41 | ginsenoside Rh1 | C36H62O9 | — |
| 42 | ginsenoside Rf | C42H72O14 | — |
| 43 | ginsenoside 20(*S*)-Rg2 | C42H72O13 | — |
| 44 | ginsenoside 20(*R*)-Rg2 | C42H72O13 | — |
| 45 | ginsenoside Rb2/Rb3 | C53H90O22 | — |
| 46 | ginsenoside Rd | C48H82O18 | — |
| 47 | ginsenoside Rg9 | C42H70O13 | — |
| 48 | ginsenoside F2 | C42H72O13 | — |
| 49 | ginsenoside Rg6 | C42H70O12 | — |
| 50 | ginsenoside 20(*S*)-Rg3 | C42H72O13 | — |
| 51 | ginsenoside F4 | C42H70O12 | — |
| 52 | ginsenoside Rs4 | C44H72O13 | — |
| 53 | soyasaponin Ba | C48H78O19 | — |
| 54 | azukisaponin Ⅱ | C42H68O14 | — |
| 55 | 22*β*-acetoxylglycyrrhizic acid | C44H64O18 | — |
| 56 | 3'-hydroxypuerarin-4'-*O*-glucoside | C27H30O15 | — |
| 57 | puerarin-4'-*O*-*β*-*D*-glucoside | C27H30O14 | — |
| 58 | 3'-methyoxy-4'-*O*-glucosyl-puerarin | C28H32O15 | — |
| 59 | mirificin | C26H28O13 | — |
| 60 | 3'-methoxydaidzin | C22H22O10 | — |
| 61 | 5'-hydroxyl oninin | C22H22O10 | — |
| 62 | 6''-*O*-acetyl daidzin | C23H22O10 | — |
| 63 | ononin | C22H22O9 | — |
| 64 | apigenin-7-*O*-*β*-*D*-glucopyranoside | C21H20O10 | — |
| 65 | glycitein | C16H12O5 | — |
| 66 | 3'-methoxydaidzein | C16H12O5 | — |
| 67 | irisolidone | C17H14O6 | — |
| 68 | calycosin | C16H12O5 | — |

Note: '—' means the relative amount < 0.01%.
